# Supplementary material for: Defining three dimensional chromatin structures of pediatric and adolescent B cells using primary B cell and EBV-immortalized B cell reference genomes
Source: Springer Nature journal article supplement (doi:10.1186/s12920-025-02166-9), 2025-05-28

## Supplementary Material

**Supplementary Figure 1. Most significant differential looping event between pediatric samples using self-called CTCF peaks or GM12878 CTCF peaks (chr22).** Loops are shown for each pediatric sample with self-called peaks on top and GM12878 CTCF peaks on the bottom. The position of both anchors are shown and the loops attributed to the anchors are in the black square.

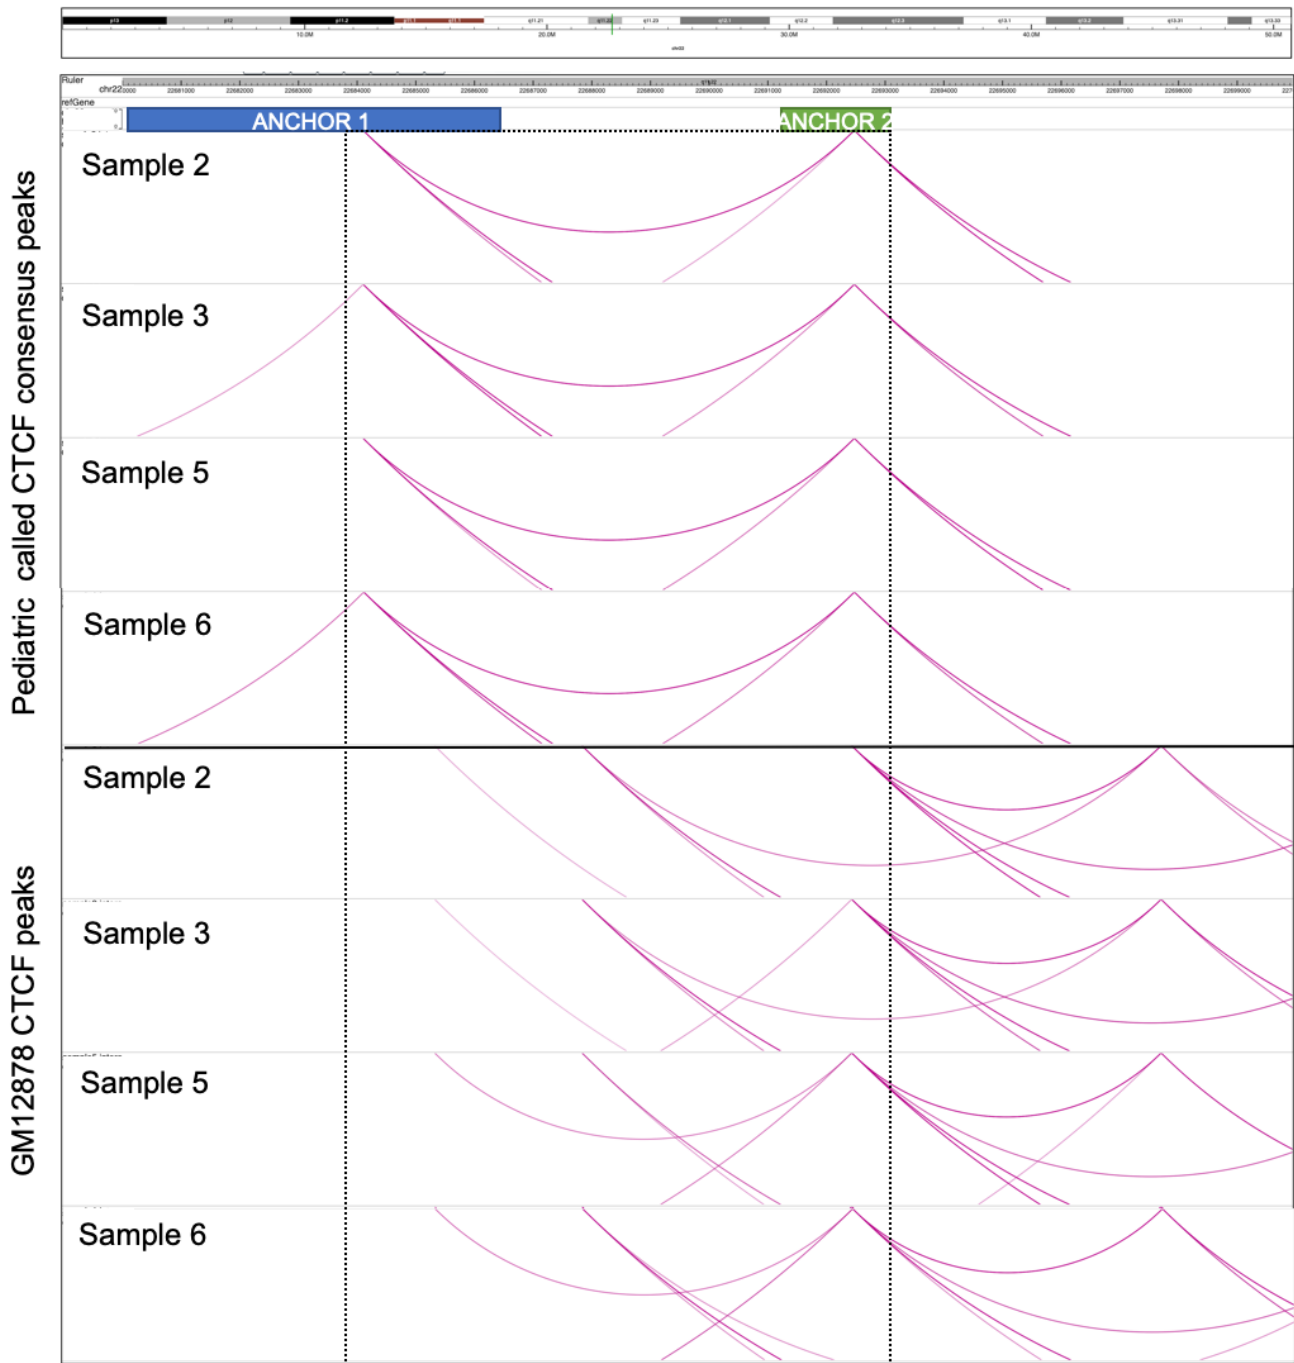

**Supplementary Figure 2. Number of significantly differential loops per gene.** A. Pediatric primary B cell self-called CTCF consensus peaks and ENCODE GM12878 CTCF peaks. B. Pediatric primary B cell self-called CTCF consensus peaks and ENCODE primary B cell adult CTCF peaks.

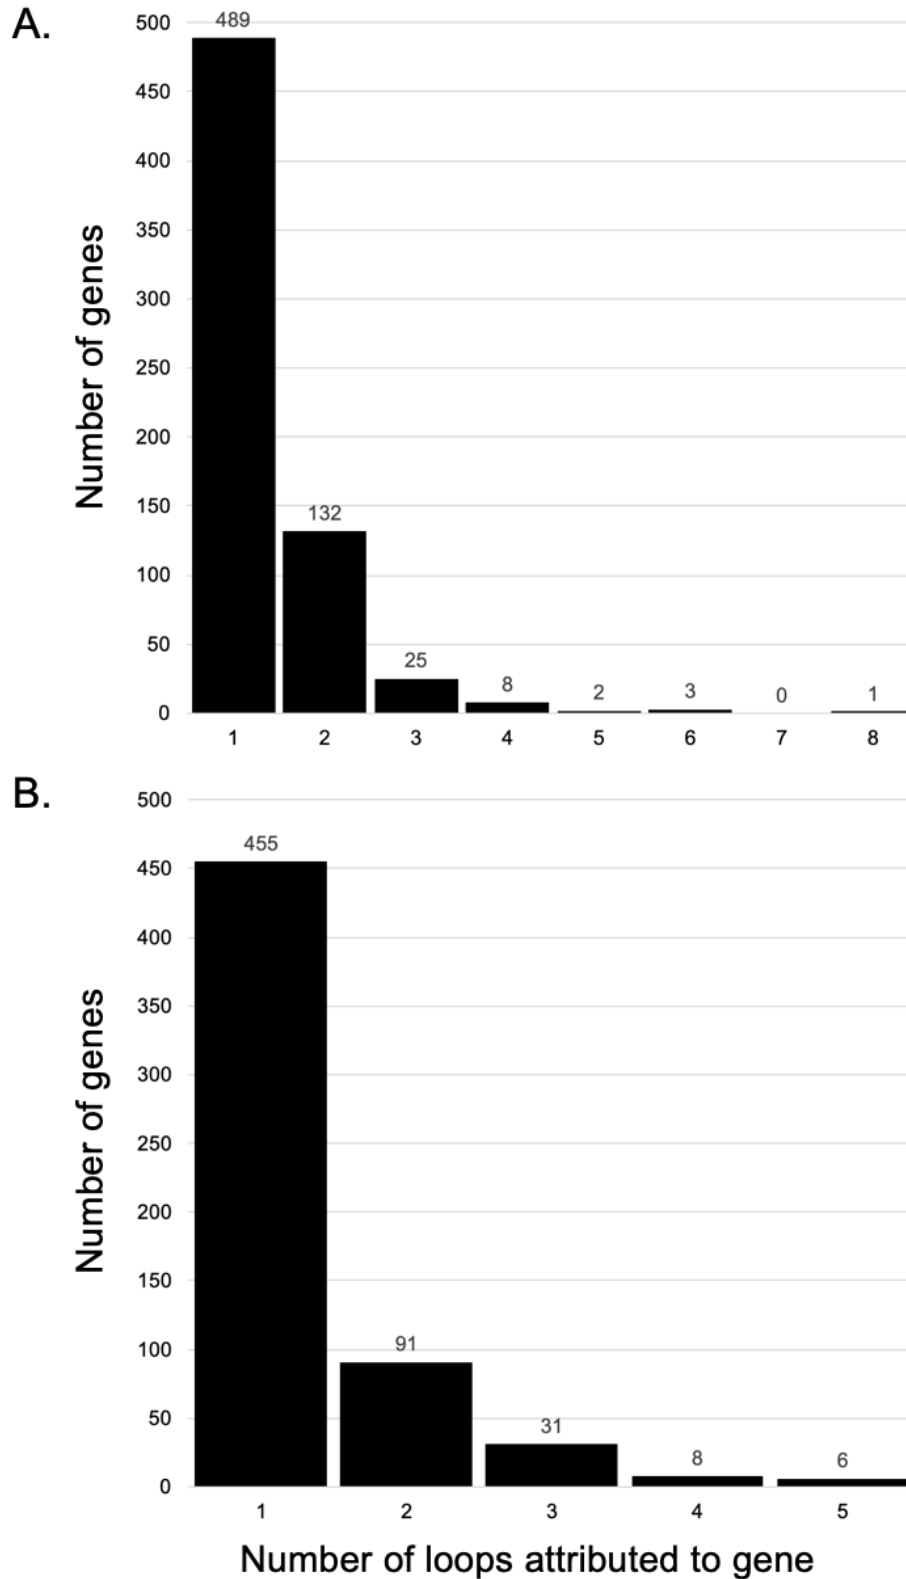

**Supplementary Figure 3. Global enrichment of reads around CTCF Hi-ChIP peaks in primary B cells collected from four pediatric samples.** Distance from the peak center is plotted on the x-axis and fold coverage change based on average coverage is plotted on the y-axis. The fold coverage change based on average coverage is calculated by taking the mean HiChIP/base coverage at each base within 1kb of ChIP-seq peak center, then dividing the # read pairs at each base pair by the mean HiChIP/base coverage, and finally calculating the mean of the coverage fold change across all ChIP peak centers.

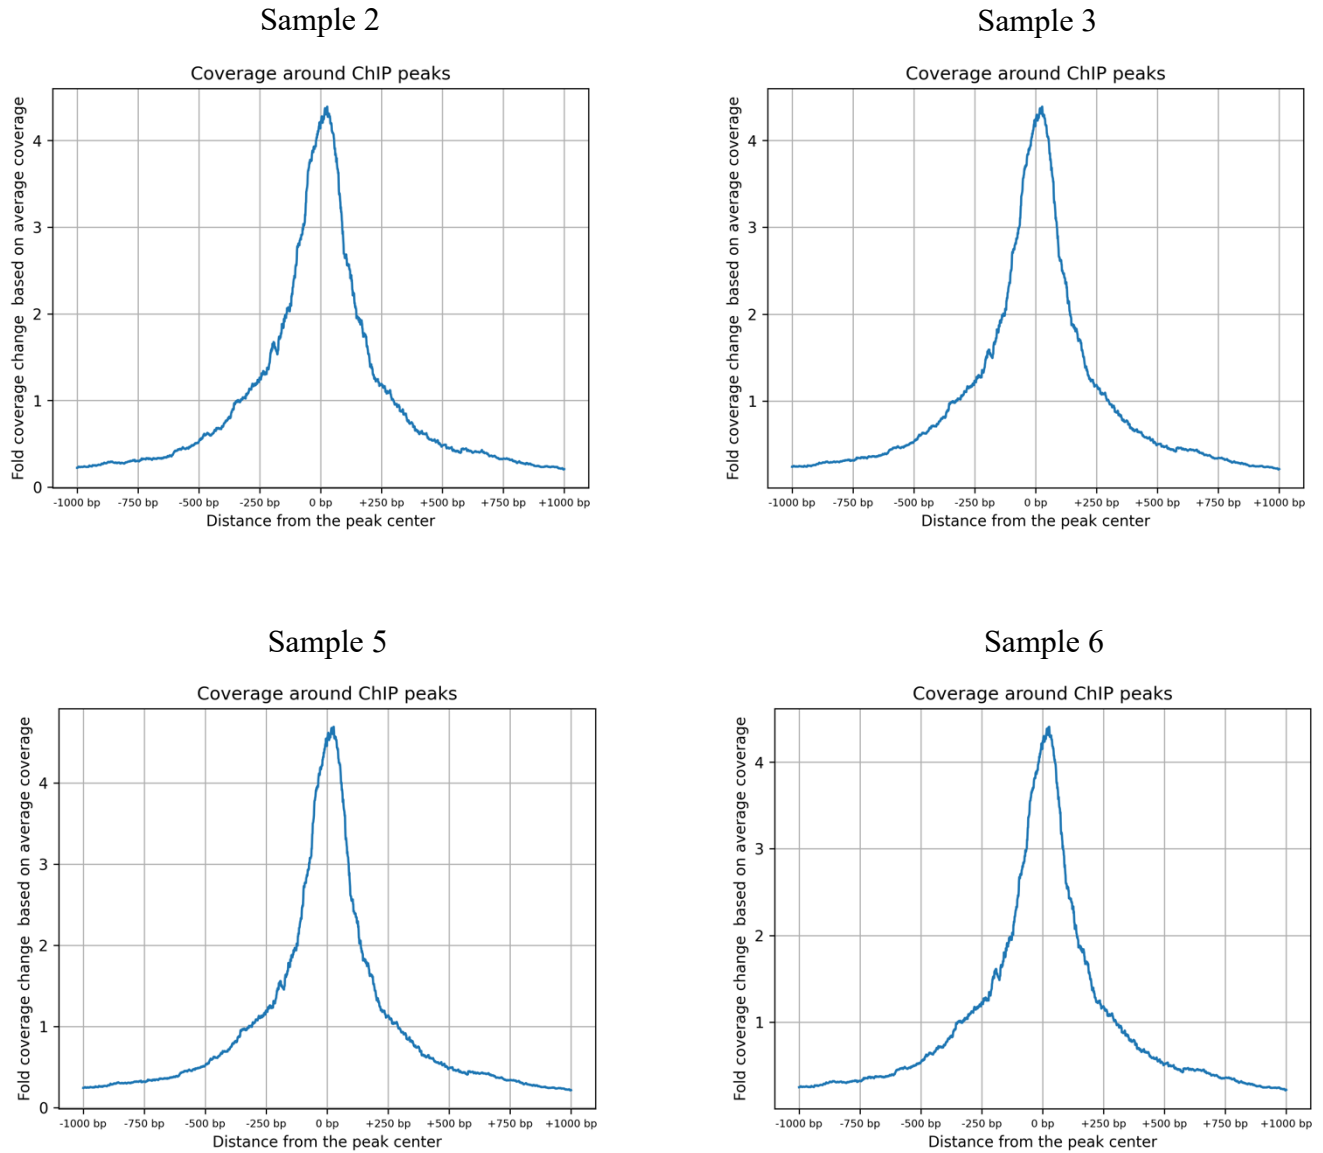

Supplement: MOESM1 [file 12920_2025_2166_MOESM1_ESM.pdf]
